# Supplementary material for: Transposable elements contribute to the evolution of host shift–related genes in cactophilic Drosophila species
Source: HighWire-hosted journal article supplement (doi:10.1101/gr.280463.125), 2026-02-10
Supplement: Supplemental_Fig_S2.pdf [file Supplemental_Fig_S2.pdf]

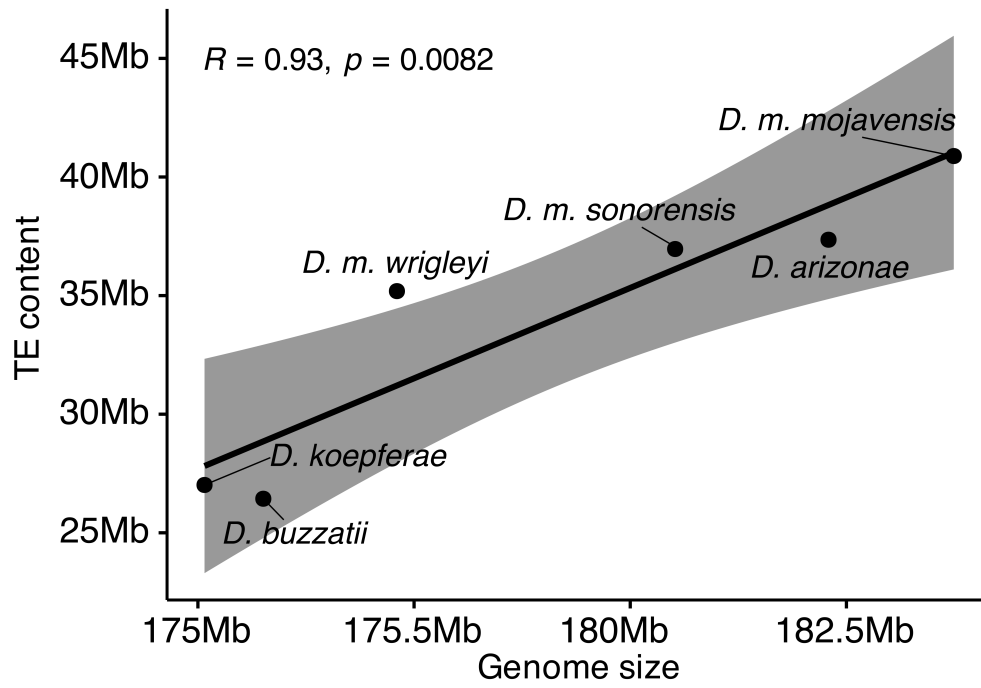

**Sup. Figure 2:** Correlation between TE content and genome size in the six nanopore genomes of cactophilic *Drosophila* species.
