# Supplementary material for: Transposable elements contribute to the evolution of host shift–related genes in cactophilic Drosophila species
Source: HighWire-hosted journal article supplement (doi:10.1101/gr.280463.125), 2026-02-10
Supplement: Supplemental_Fig_S3.pdf [file Supplemental_Fig_S3.pdf]

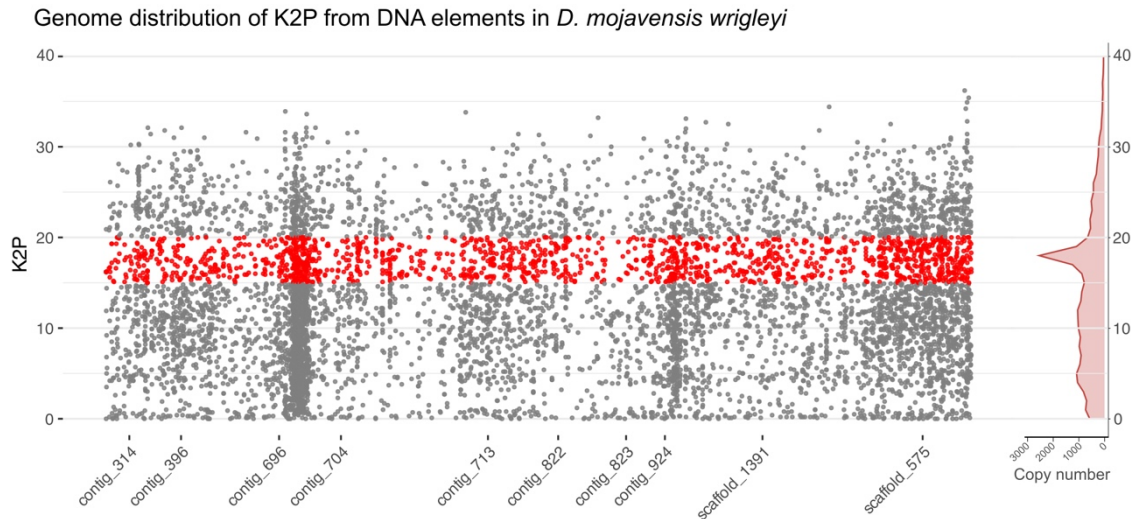

**Sup. Figure 3:** Genome distribution of Kimura 2-Parameters divergence from DNA elements across the 10 longest scaffolds/contigs in the *D. m. wrigleyi*. These 10 scaffolds/contigs sum up 144.7Mb, comprising 81.6% of the genome assembly. Low K2P means young insertions, while high K2P means old, relative to the consensus sequence. Red dots are insertions with  $K2P \geq 15$  and  $\leq 20$ , which have a peak in copy number in the *D. m. wrigleyi* genome. The result demonstrate even genome distribution from insertions with 15-20 K2P in the genome, rather than local accumulation.
