# Supplementary material for: Transposable elements contribute to the evolution of host shift–related genes in cactophilic Drosophila species
Source: HighWire-hosted journal article supplement (doi:10.1101/gr.280463.125), 2026-02-10
Supplement: Supplemental_Fig_S5.pdf [file Supplemental_Fig_S5.pdf]

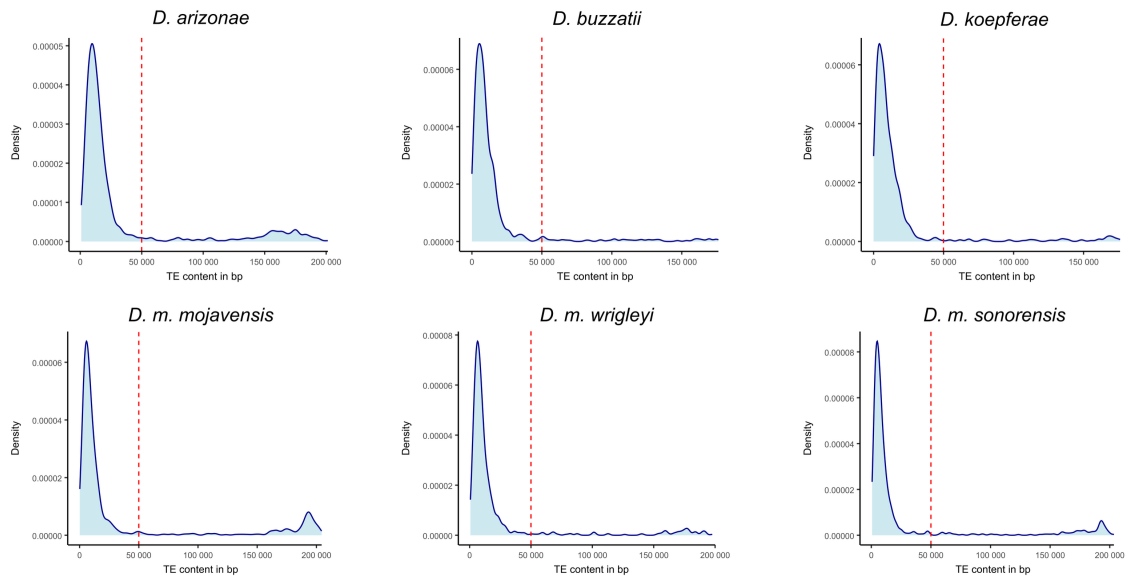

**Sup. Figure 5:** Frequency of TE copies over 200kb genomic bins. The vertical red dotted line represents the TE-rich threshold: over 50kb comprised by TEs. The distribution on the right side of this line represents TE-rich scaffolds.
