# Supplementary material for: Transposable elements contribute to the evolution of host shift–related genes in cactophilic Drosophila species
Source: HighWire-hosted journal article supplement (doi:10.1101/gr.280463.125), 2026-02-10
Supplement: Supplemental_Fig_S6.pdf [file Supplemental_Fig_S6.pdf]

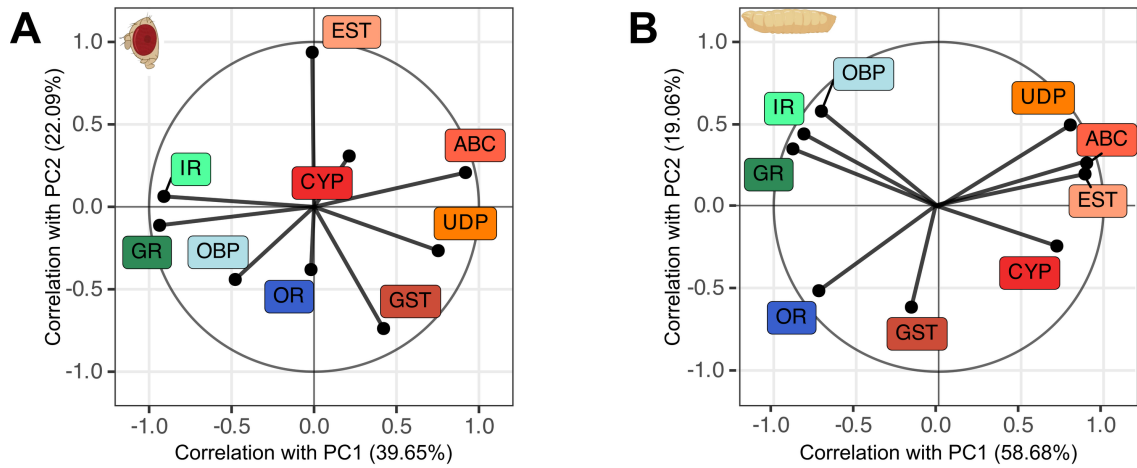

**Sup. Figure 6:** Correlation of HLAU gene families with Principal Components (PC1 and PC2) variance from gene expression analysis. **A)** In head, host usage genes ABC, UDP, and GST have high correlation with PC1 variance, whereas EST is highly correlated with PC2. **B)** In larvae, host usage genes UDP, ABC, EST, and CYP genes are highly correlated with PC1, while GR, IR, and OBP have high correlation with PC2.
