# Supplementary material for: Transposable elements contribute to the evolution of host shift–related genes in cactophilic Drosophila species
Source: HighWire-hosted journal article supplement (doi:10.1101/gr.280463.125), 2026-02-10
Supplement: Supplemental_Fig_S7.pdf [file Supplemental_Fig_S7.pdf]

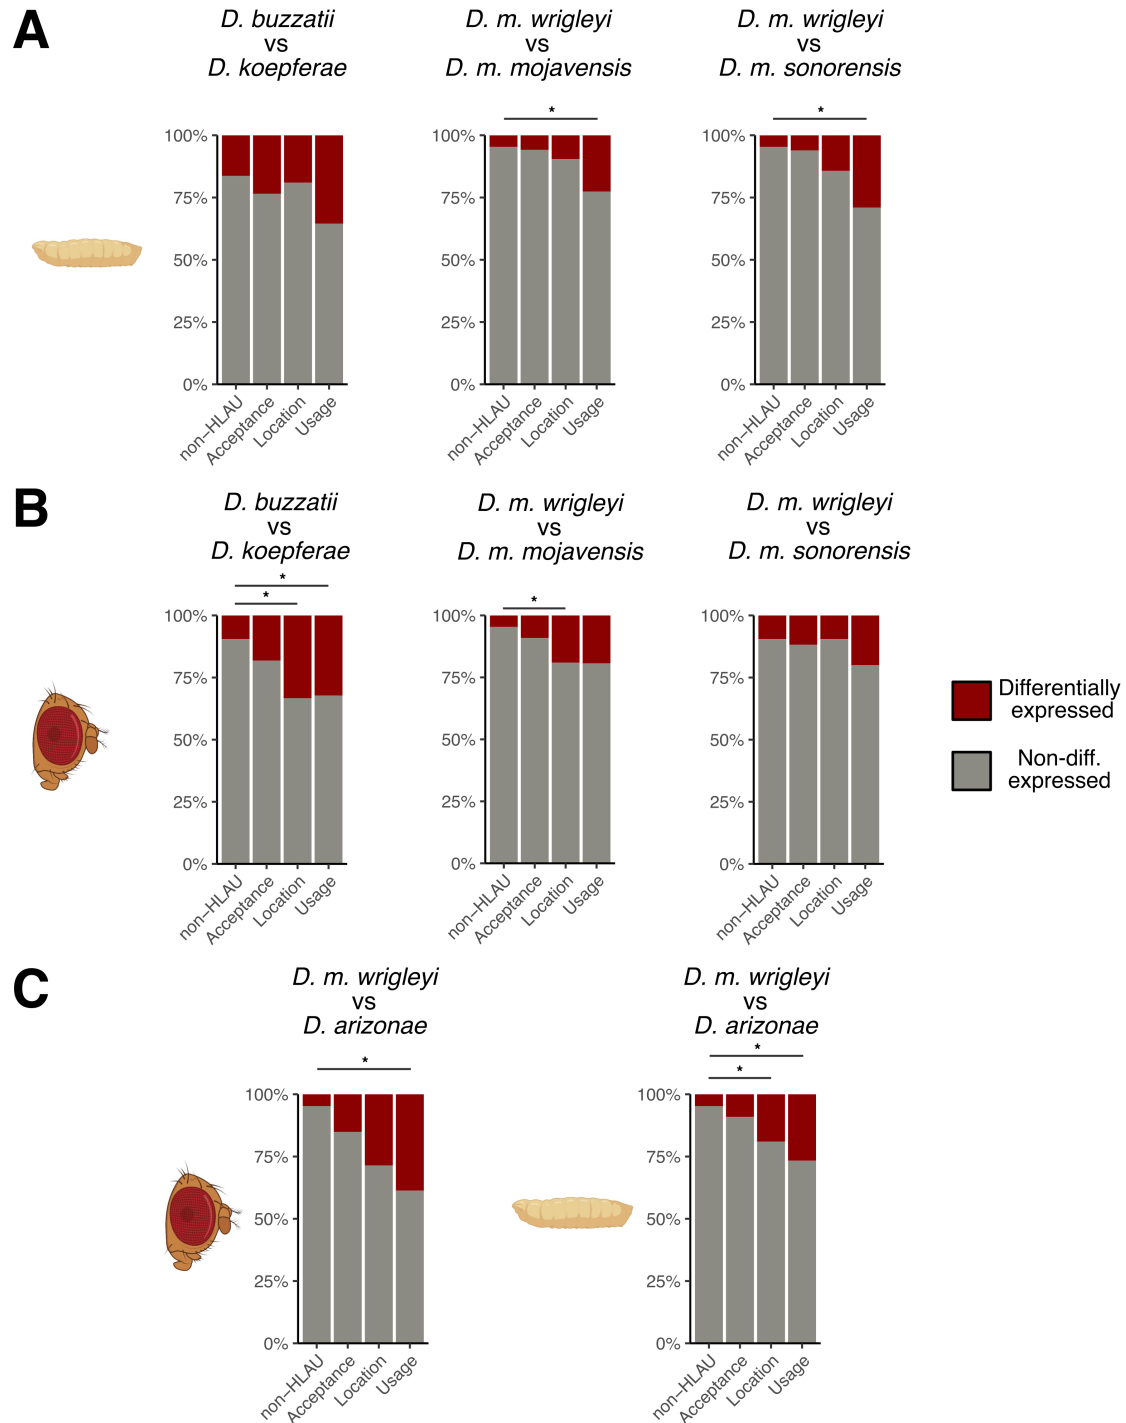

**Sup. Figure 7:** Fisher's exact test between the proportions of differentially expressed genes from location, acceptance, and host use gene families, compared to non-HLAU genes (Ser/Thr Kinases and zinc-finger proteins). Bars connected by a line with a star on the top represent p-value < 0.05. The pairwise analysis was performed between species with preference for *Opuntia* sp. (*D. buzzatii* and *D. m. wrigleyi*) and columnar cacti dwellers (*D. koepferae*, *D. m. mojavensis*, and *D. m. sonorensis*) in A and B. **A)** Fisher's exact test was calculated from differentially expressed genes in larvae. **B)** Fisher's exact test calculated from differentially

expressed genes in head. **C)** Fisher's exact test calculated from differentially expressed genes from *D. m. wrigleyi* with preference for *Opuntia sp.* and *D. arizonae* as a non-preferential cactus.
