# Supplementary material for: Transposable elements contribute to the evolution of host shift–related genes in cactophilic Drosophila species
Source: HighWire-hosted journal article supplement (doi:10.1101/gr.280463.125), 2026-02-10
Supplement: Supplemental_Fig_S8.pdf [file Supplemental_Fig_S8.pdf]

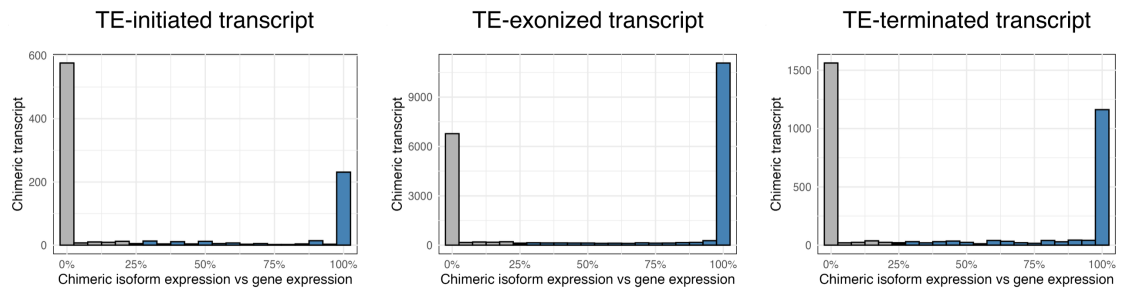

**Sup. Figure 8:** Histograms with the contribution of chimeric isoform expression relative to total gene expression per chimeric transcript type. Grey bars represent contribution < 25% and blue bars represent contribution > 25%. Chimeric transcripts with contribution < 25% were discarded in this work. TE-exonized transcripts represent the merged result from ChimeraTE: embedded, overlapped and intronic chimeras.
