# Supplementary material for: Transposable elements contribute to the evolution of host shift–related genes in cactophilic Drosophila species
Source: HighWire-hosted journal article supplement (doi:10.1101/gr.280463.125), 2026-02-10
Supplement: Supplemental_Table_S3.xlsx [file Supplemental_Table_S3.xlsx]

## Sheet: Supplemental Table S3
Table S3: Results of the molecular evolution analysis performed by paPAML with codeml models. Genes with signs of positive selection are highlighted in yellow (LOC6585222 and LOC26527843). Significance was determined based on Benjamini-Hochberg FDR correction < 0.05.
Odorant receptor
Site model							Branch model						Branch-site model
geneID	diff. LnL	pos/aa	omega	p-value	FDR		diff. LnL	omega_background	omega_foreground	p-value	FDR		w0_null	w1_null	w2_null	lnl_null	w0_alt	w1_alt	w2_alt	lnl_alt	p-value	FDR
LOC26528431	2.27123	-	-	0.32122	1		49.543	0.39203	0.01626	0	2.15E-07		0.220046	1	1	-2935.29	0.237065	1	2.98377	-2935.29	1	1
LOC6572272	6e-06	-	-	1	1		20.2324	0.11782	0.16899	7e-06	1.34776119402985E-05		0.264145	1	1	-2940.21	0.244748	1	2.53945	-2940.02	0.541303	1
LOC6572274	1.20629	-	-	0.54709	1		44.8743	0.01162	0.03313	0	2.15E-07		0.231524	1	1	-2668.54	0.254026	1	2.97924	-2668.54	1	1
LOC6572390	0.001086	-	-	0.99946	1		16.4169	0.06641	0.14912	5.1e-05	8.43461538461538E-05		0.228631	1	1	-1573.06	0.216928	1	2.76464	-1573.06	1	1
LOC6575386	7.05129	126/S	2.366	0.029433	0.476365		13.7689	0.22243	0.16602	0.000207	0.00029344		0.277534	1	1	-2875.73	0.225342	1	2.76593	-2875.73	1	1
LOC6575387	2.04497	-	-	0.3597	1		8.61334	0.18417	0.26472	0.003337	0.00417935		0.233275	1	1	-2529.47	0.207574	1	3.03785	-2529.47	1	1
LOC6575762	4.73055	35/R, 116/T	3.194/3.201	0.093924	0.865443		27.102	0.19336	0.12887	0	2.15E-07		0.225217	1	1	-2452.39	0.206773	1	2.83526	-2452.39	1	1
LOC6575880	2.08236	-	-	0.35304	1		4.09101	0.26652	0.54751	0.043112	0.0446773		0.270105	1	1	-2889.94	0.235429	1	3.22098	-2889.92	0.86775	1
LOC6577030	0.070268	-	-	0.96548	1		1.29514	0.41589	0.64698	0.2551	0.257093		0.291696	1	1	-3319.96	0.208712	1	2.9826	-3319.24	0.231	1
LOC6577461	1e-05	-	-	1	1		9.42903	0.19066	0.1979	0.002136	0.00272816		0.216567	1	1	-2850.4	0.210127	1	2.94308	-2850.4	1	1
LOC6577741	1.71474	-	-	0.42428	1		18.343	0.16203	0.25339	1.8e-05	3.225E-05		0.241057	1	1	-2750.33	0.238072	1	3.24247	-2750.33	1	1
LOC6578554	0.990352	-	-	0.60946	1		27.8247	0.04942	0.02719	0	2.15E-07		0.27474	1	1	-2383.5	0.289664	1	2.6835	-2383.5	1	1
LOC6578737	0.740178	-	-	0.69067	1		6.95564	0.20571	0.34297	0.008356	0.00962432		0.219704	1	1	-2406.21	0.236679	1	2.56956	-2406.21	1	1
LOC6579081	5.25384	-	-	0.072301	0.717448		25.2945	0.14494	0.1348	0	2.15E-07		0.216457	1	1	-2339.78	0.266993	1	2.71122	-2339.78	1	1
LOC6579644	0.368374	-	-	0.83178	1		26.7596	0.21015	0.16446	0	2.15E-07		0.216458	1	1	-3088.49	0.225038	1	3.06358	-3088.49	1	1
LOC6582283	0.1651	-	-	0.92077	1		10.1489	0.36902	0.24039	0.001444	0.00190078		0.278316	1	1	-3191.14	0.202041	1	2.95442	-3191.14	1	1
LOC6583016	1.16938	-	-	0.55728	1		5.27642	0.18414	0.28681	0.021616	0.0230452		0.250272	1	1	-2681.65	0.239986	1	3.29962	-2681.65	1	1
LOC6583506	0.000262	-	-	0.99987	1		6.62356	0.10807	0.36721	0.010064	0.0112892		0.276947	1	1	-2733.17	0.280133	1	2.54972	-2732.69	0.325158	1
LOC6584534	0.084094	-	-	0.95882	1		8.47365	0.11498	0.21987	0.003603	0.00442654		0.211668	1	1	-2552.33	0.239418	1	2.89488	-2552.33	1	1
LOC6585146	0.360406	-	-	0.8351	1		55.473	0.02694	0.0001	0	2.15E-07		0.276595	1	1	-2216.53	0.254245	1	3.15566	-2216.53	1	1
Odorant-binding protein
Site model							Branch model						Branch-site model
geneID	diff. LnL	pos/aa	omega	p-value	FDR		diff. LnL	omega_background	omega_foreground	p-value	FDR		w0_null	w1_null	w2_null	lnl_null	w0_alt	w1_alt	w2_alt	lnl_alt	p-value	FDR
LOC6572739	0.002442	-	-	0.99878	1		6.28821	0.04304	0.04474	0.012154	0.0135161		0.266022	1	1	-901.884	0.270731	1	2.90007	-901.884	1	1
LOC6572744	0.000106	-	-	0.99995	1		5.85873	0.04807	0.13922	0.0155	0.0169449		0.270413	1	1	-882.057	0.271407	1	2.63436	-882.057	1	1
LOC6574749	0.022842	-	-	0.98864	1		19.1688	0.15216	0.08133	1.2e-05	2.18028169014085E-05		0.210798	1	1	-900.475	0.262275	1	3.05036	-900.475	0.997743	1
LOC6576646	0.42905	-	-	0.80692	1		0.059986	0.15115	1.35204	0.80652	0.80652		0.218441	1	1	-956.086	0.299777	1	2.62892	-956.069	0.854959	1
LOC6578242	8.18495	162/G	6.087	0.016698	0.359007		8.23139	0.24604	0.19445	0.004117	0.00501031		0.296258	1	1	-1217.98	0.267184	1	2.69522	-1217.98	1	1
LOC6579177	4e-05	-	-	0.99998	1		13.7865	0.07954	0.03178	0.000205	0.00029344		0.215103	1	1	-714.13	0.232891	1	3.05739	-714.13	1	1
LOC6579244	0.01739	-	-	0.99134	1		23.0518	0.06802	0.02925	2e-06	4.03125E-06		0.247883	1	1	-1235.81	0.250088	1	2.83268	-1235.81	1	1
LOC6580686	0.0189	-	-	0.99059	1		1.90404	0.29035	0.50408	0.16763	0.17027		0.274097	1	1	-1046.94	0.263184	1	2.74594	-1046.94	1	1
LOC6580688	4.6e-05	-	-	0.99998	1		6.0351	0.07789	0.3003	0.014024	0.0154624		0.262421	1	1	-823.528	0.271321	1	2.95366	-820.531	0.0143596	0.771265
LOC6580699	1.6e-05	-	-	0.99999	1		5.22844	0.17745	0.2777	0.02222	0.0234949		0.279251	1	1	-960.566	0.203866	1	2.62566	-960.566	1	1
LOC6584454	2e-06	-	-	1	1		13.6465	0.19864	0.06078	0.000221	0.00030988		0.22627	1	1	-1093.55	0.24739	1	3.25495	-1093.55	1	1
LOC6585379	8e-05	-	-	0.99996	1		17.8149	0.10418	0.05095	2.4e-05	4.128E-05		0.279602	1	1	-854.894	0.252447	1	3.33669	-854.894	1	1
LOC6585380	3.2e-05	-	-	0.99998	1		6.8032	0.09654	0.17097	0.009099	0.0103874		0.263533	1	1	-1037.41	0.244393	1	3.00496	-1037.1	0.42928	1
LOC6585382	0.989354	-	-	0.60977	1		9.79665	0.35698	0.165	0.001748	0.0022777		0.286489	1	1	-1047.75	0.205042	1	2.85752	-1045.37	0.0292758	0.771265
Gustatory receptor
Site model							Branch model						Branch-site model
geneID	diff. LnL	pos/aa	omega	p-value	FDR		diff. LnL	omega_background	omega_foreground	p-value	FDR		w0_null	w1_null	w2_null	lnl_null	w0_alt	w1_alt	w2_alt	lnl_alt	p-value	FDR
LOC6572935	6e-05	-	-	0.99997	1		15.9219	0.1628	0.26757	6.6e-05	0.000103829		0.21496	1	1	-2913.41	0.204986	1	3.38562	-2913.31	0.650078	1
LOC6575375	5.43352	340/R	1.996	0.066089	0.717448		16.8629	0.10021	0.12562	4e-05	6.7012987012987E-05		0.274816	1	1	-2694.1	0.297966	1	3.30138	-2693.95	0.583235	1
LOC6575847	0.22246	-	-	0.89473	1		2.72937	0.06791	0.18994	0.098518	0.100864		0.264734	1	1	-3430.04	0.204766	1	3.44061	-3430.04	1	1
LOC6576247	0	-	-	1	1		17.4864	0.28171	0.19959	2.9e-05	4.92236842105263E-05		0.230831	1	1	-2837.64	0.296449	1	2.54118	-2837.64	1	1
LOC6578371	5.6e-05	-	-	0.99997	1		29.0211	0.16636	0.13817	0	2.15E-07		0.243135	1	1	-2814.28	0.26427	1	2.91384	-2814.28	1	1
LOC6580088	5.2e-05	-	-	0.99997	1		7.17228	0.16493	0.34695	0.007404	0.00868287		0.280692	1	1	-2998.47	0.285054	1	2.67147	-2997.01	0.0874849	1
LOC6580274	0.43285	-	-	0.80539	1		17.967	0.20925	0.19199	2.2e-05	3.83513513513513E-05		0.280019	1	1	-2867.72	0.267026	1	3.42067	-2867.72	1	1
LOC6580772	0.335928	-	-	0.84538	1		5.73624	0.1903	0.37322	0.016618	0.0180145		0.253043	1	1	-3086.3	0.248836	1	3.12962	-3085.62	0.243445	1
LOC6583472	0.000272	-	-	0.99986	1		13.5717	0.0783	0.16342	0.00023	0.000319032		0.284913	1	1	-2573.54	0.217008	1	2.73205	-2573.54	1	1
LOC6584387	0.400574	-	-	0.8185	1		12.8069	0.12481	0.26533	0.000345	0.000468474		0.235419	1	1	-2748.79	0.230431	1	2.54473	-2748.79	1	1
LOC6585360	0.134466	-	-	0.93498	1		7.07476	0.30819	0.34525	0.007818	0.00908578		0.298118	1	1	-2860.51	0.265269	1	3.12296	-2858.02	0.0257929	0.771265
LOC6587082	0.323248	-	-	0.85076	1		14.9642	0.13529	0.18183	0.00011	0.000163103		0.235105	1	1	-2436.64	0.284533	1	2.50887	-2436.64	1	1
Ionotropic receptor
Site model							Branch model						Branch-site model
geneID	diff. LnL	pos/aa	omega	p-value	FDR		diff. LnL	omega_background	omega_foreground	p-value	FDR		w0_null	w1_null	w2_null	lnl_null	w0_alt	w1_alt	w2_alt	lnl_alt	p-value	FDR
LOC6575093	0.51926	-	-	0.77134	1		31.2769	0.06059	0.17572	0	2.15E-07		0.222787	1	1	-4794.19	0.287492	1	3.14971	-4794.19	1	1
LOC6575095	10.3228	-	-	0.005734	0.234651		84.1928	0.01094	0.00785	0	2.15E-07		0.263369	1	1	-4765.43	0.221298	1	2.968	-4765.35	0.694499	1
LOC6576652	0.000618	-	-	0.99969	1		51.7344	0.06908	0.07121	0	2.15E-07		0.280135	1	1	-4280.01	0.25599	1	3.04442	-4279.83	0.55182	1
LOC6577651	0.00063	-	-	0.99969	1		45.7409	0.03965	0.08591	0	2.15E-07		0.266131	1	1	-4952.21	0.257985	1	3.4565	-4952.21	1	1
LOC6577874	0.00017	-	-	0.99992	1		90.7335	0.03266	0.04317	0	2.15E-07		0.273051	1	1	-5471.33	0.273943	1	3.2092	-5468.07	0.010712	0.771265
LOC6581247	3.6e-05	-	-	0.99998	1		69.0261	0.05241	0.06517	0	2.15E-07		0.260497	1	1	-5528.18	0.263425	1	3.42915	-5527.63	0.290428	1
LOC6582217	0.1009	-	-	0.9508	1		26.6504	0.09383	0.17686	0	2.15E-07		0.232465	1	1	-5056.68	0.214147	1	3.02423	-5056.28	0.37229	1
LOC6583245	0.93305	-	-	0.62718	1		29.9146	0.05228	0.06527	0	2.15E-07		0.287411	1	1	-3743.55	0.259276	1	3.00717	-3743.55	1	1
LOC6585739	3.15811	-	-	0.20617	1		36.8339	0.05487	0.11646	0	2.15E-07		0.236659	1	1	-6362.25	0.236526	1	2.87585	-6361.5	0.221886	1
Cytochrome P450
Site model							Branch model						Branch-site model
geneID	diff. LnL	pos/aa	omega	p-value	FDR		diff. LnL	omega_background	omega_foreground	p-value	FDR		w0_null	w1_null	w2_null	lnl_null	w0_alt	w1_alt	w2_alt	lnl_alt	p-value	FDR
LOC6572829	1.8e-05	-	-	0.99999	1		14.6518	0.15781	0.15221	0.000129	0.000189102		0.294227	1	1	-3623.68	0.2325	1	2.96261	-3623.28	0.373108	1
LOC6573058	9.61416	-	-	0.008172	0.234651		19.3797	0.1342	0.20657	1.1e-05	2.02714285714286E-05		0.230303	1	1	-3529.98	0.260923	1	2.64864	-3529.98	1	1
LOC6573758	3e-05	-	-	0.99999	1		34.0689	0.10192	0.12564	0	2.15E-07		0.218937	1	1	-3496.5	0.201763	1	2.87746	-3496.5	1	1
LOC6574861	0.275188	-	-	0.87145	1		13.5024	0.12473	0.20711	0.000238	0.000326617		0.298328	1	1	-3835.95	0.292781	1	3.07731	-3835.95	1	1
LOC6574889	0.485226	-	-	0.78458	1		23.7442	0.10026	0.19584	1e-06	2.04761904761905E-06		0.293134	1	1	-3220.02	0.234405	1	3.49705	-3220.02	1	1
LOC6575539	4.8e-05	-	-	0.99998	1		8.94954	0.14075	0.25865	0.002775	0.00350956		0.25385	1	1	-3422.36	0.207142	1	3.17743	-3422.36	1	1
LOC6575851	0.000112	-	-	0.99994	1		38.6888	0.04406	0.04835	0	2.15E-07		0.226283	1	1	-2934.14	0.277755	1	2.75682	-2934.14	1	1
LOC6576545	0.851038	-	-	0.65343	1		18.1519	0.08465	0.1462	2e-05	3.53424657534247E-05		0.294464	1	1	-3241.62	0.215508	1	2.52973	-3241.21	0.36431	1
LOC6576681	0.30148	-	-	0.86007	1		24.1816	0.1	0.00054	1e-06	2.04761904761905E-06		0.212729	1	1	-3396.67	0.284082	1	3.03026	-3396.67	1	1
LOC6576764	8e-06	-	-	1	1		32.0192	0.12983	0.0973	0	2.15E-07		0.281396	1	1	-3362.82	0.210257	1	2.74385	-3362.82	1	1
LOC6577726	1.69611	-	-	0.42825	1		6.7342	0.15639	0.32568	0.009458	0.0107025		0.271768	1	1	-3008.55	0.248378	1	3.43264	-3006.87	0.0667424	1
LOC6578754	2.62421	-	-	0.26925	1		16.183	0.11595	0.18606	5.8e-05	9.23703703703704E-05		0.271526	1	1	-3172.93	0.200273	1	3.07788	-3172.93	1	1
LOC6579097	1.28837	-	-	0.52509	1		54.6446	0.07131	0.09458	0	2.15E-07		0.298942	1	1	-3660.56	0.280453	1	3.41284	-3660.56	1	1
LOC6579098	0.00092	-	-	0.99954	1		45.6768	0.06161	0.08322	0	2.15E-07		0.242661	1	1	-3651.71	0.26057	1	2.79311	-3651.71	1	1
LOC6579224	7.04387	-	-	0.029542	0.476365		32.3029	0.11538	0.07347	0	2.15E-07		0.268671	1	1	-3210.93	0.248353	1	3.27847	-3210.93	1	1
LOC6579320	0.795346	-	-	0.67188	1		34.5104	0.12337	0.14058	0	2.15E-07		0.252532	1	1	-3740.31	0.224706	1	3.37574	-3740.31	1	1
LOC6579783	2.4e-05	-	-	0.99999	1		35.0799	0.07443	0.09247	0	2.15E-07		0.284414	1	1	-3186.63	0.248977	1	2.52904	-3186.63	1	1
LOC6580325	3.59599	-	-	0.16563	1		32.3293	0.0628	0.10803	0	2.15E-07		0.240054	1	1	-3284.4	0.252051	1	3.4119	-3284.4	1	1
LOC6580402	4.41441	-	-	0.11001	0.946086		43.3547	0.11052	0.08131	0	2.15E-07		0.237018	1	1	-3405.99	0.212816	1	3.0927	-3405.99	1	1
LOC6580984	0.000158	-	-	0.99992	1		15.0401	0.14294	0.25862	0.000105	0.00016125		0.239705	1	1	-3376.77	0.206745	1	3.11747	-3376.77	1	1
LOC6581432	0.000194	-	-	0.9999	1		14.9968	0.11192	0.17762	0.000108	0.000163103		0.295107	1	1	-3313.37	0.22555	1	3.47444	-3313.37	1	1
LOC6582918	1.22034	-	-	0.54326	1		15.6367	0.14477	0.19161	7.7e-05	0.000119675		0.210906	1	1	-3675.87	0.239212	1	3.08901	-3675.87	1	1
LOC6583072	0.368014	-	-	0.83193	1		25.6833	0.07884	0.13857	0	2.15E-07		0.269238	1	1	-3269.1	0.272913	1	3.09252	-3268.69	0.363775	1
LOC6584009	0.131814	-	-	0.93622	1		38.7091	0.06468	0.0813	0	2.15E-07		0.204784	1	1	-3060.2	0.294744	1	3.47084	-3060.2	1	1
LOC6584678	0.000344	-	-	0.99983	1		37.0231	0.02217	0.03696	0	2.15E-07		0.287337	1	1	-3124.03	0.269458	1	3.34962	-3124.03	1	1
LOC6585072	2e-06	-	-	1	1		35.7816	0.09773	0.0802	0	2.15E-07		0.291382	1	1	-2959.47	0.22413	1	3.0353	-2957.11	0.029894	0.771265
LOC6585222	14.7978	23/L, 68/Q	4.708, 4.698	0.000612	0.039474		12.0486	0.18259	0.29607	0.000518	0.000696062		0.218276	1	1	-3365.08	0.251013	1	3.44205	-3365.08	0.97269	1
LOC6585988	0.00011	-	-	0.99995	1		45.7014	0.02375	0.0288	0	2.15E-07		0.22918	1	1	-3022.3	0.226135	1	2.85958	-3022.3	1	1
LOC6586100	2.77958	21/V	2.143	0.24913	1		31.9502	0.08546	0.09847	0	2.15E-07		0.254442	1	1	-2985.23	0.235259	1	2.63419	-2985.23	1	1
ATP-binding cassette
Site model							Branch model						Branch-site model
geneID	diff. LnL	pos/aa	omega	p-value	FDR		diff. LnL	omega_background	omega_foreground	p-value	FDR		w0_null	w1_null	w2_null	lnl_null	w0_alt	w1_alt	w2_alt	lnl_alt	p-value	FDR
LOC26527843	17.3979	40/S, 46/P, 58/T, 62/E, 67/L, 70/N, 85/Y	3.091, 3.113, 3.131, 3113, 3.139, 3.116, 3.113	0.000167	0.021543		81.7799	0.13464	0.05124	0	2.15E-07		0.255528	1	1	-5210.62	0.212866	1	2.99553	-5210.62	1	1
LOC6573196	0.0021	-	-	0.99895	1		91.6734	0.02032	0.01573	0	2.15E-07		0.236658	1	1	-3467.61	0.283826	1	3.23672	-3467.61	1	1
LOC6576239	3.10893	-	-	0.2113	1		29.1582	0.13609	0.18101	0	2.15E-07		0.217367	1	1	-4553.4	0.23458	1	3.44166	-4553.4	1	1
LOC6576813	0.00017	-	-	0.99992	1		56.9435	0.06702	0.03933	0	2.15E-07		0.241275	1	1	-4087.79	0.257065	1	3.00969	-4087.79	1	1
LOC6577398	0.04343	-	-	0.97852	1		48.4458	0.08332	0.03774	0	2.15E-07		0.236763	1	1	-3552.28	0.284379	1	2.98639	-3552.28	1	1
LOC6577540	2.8e-05	-	-	0.99999	1		19.4756	0.0922	0.16262	1e-05	1.8695652173913E-05		0.230212	1	1	-3778.79	0.291092	1	2.72899	-3778.79	1	1
LOC6582782	0.061394	-	-	0.96977	1		54.7339	0.02212	0.01978	0	2.15E-07		0.292343	1	1	-4018.3	0.238982	1	2.94073	-4018.3	1	1
LOC6583165	0.295172	-	-	0.86279	1		31.906	0.03849	0.0439	0	2.15E-07		0.272946	1	1	-3546.41	0.236192	1	3.14202	-3546.41	1	1
LOC6583362	0.00272	-	-	0.99864	1		75.8815	0.00336	0.01611	0	2.15E-07		0.225086	1	1	-3367.56	0.289566	1	3.03653	-3367.56	1	1
LOC6584542	1.6e-05	-	-	0.99999	1		60.6395	0.0766	0.09073	0	2.15E-07		0.282083	1	1	-5509.38	0.240876	1	3.33369	-5509.26	0.628553	1
LOC6585677	0.003654	-	-	0.99817	1		51.2339	0.00309	0.0001	0	2.15E-07		0.297634	1	1	-3242.52	0.270394	1	3.07221	-3242.52	1	1
Esterase
Site model							Branch model						Branch-site model
geneID	diff. LnL	pos/aa	omega	p-value	FDR		diff. LnL	omega_background	omega_foreground	p-value	FDR		w0_null	w1_null	w2_null	lnl_null	w0_alt	w1_alt	w2_alt	lnl_alt	p-value	FDR
LOC26527135	6.20918	-	-	0.044843	0.578475		9.51378	0.16475	0.3357	0.002039	0.00263031		0.273081	1	1	-4391.81	0.253009	1	3.38768	-4389.87	0.0493179	1
LOC6572607	9.40016	7/Q, 10/R	2.674, 2.655	0.009095	0.234651		29.061	0.05343	0.09863	0	2.15E-07		0.223199	1	1	-3410.65	0.294868	1	2.65088	-3410.65	1	1
LOC6572608	0.000256	-	-	0.99987	1		36.9992	0.02446	0.04372	0	2.15E-07		0.217726	1	1	-3010.4	0.248925	1	3.35359	-3010.4	1	1
LOC6572614	5.2e-05	-	-	0.99997	1		34.9575	0.19684	0.13197	0	2.15E-07		0.259376	1	1	-4071.31	0.242492	1	3.45126	-4071.31	1	1
LOC6574480	0.883246	-	-	0.64299	1		33.7416	0.15111	0.16615	0	2.15E-07		0.289552	1	1	-4185.47	0.214324	1	2.89481	-4185.47	1	1
LOC6575048	0.000248	-	-	0.99988	1		45.2303	0.03739	0.0226	0	2.15E-07		0.254044	1	1	-1770.05	0.291153	1	3.27817	-1770.05	1	1
LOC6575275	2.15814	-	-	0.33991	1		31.8819	0.04541	0.03319	0	2.15E-07		0.262226	1	1	-3521.13	0.286539	1	3.32135	-3521.13	1	1
LOC6575897	6.26194	-	-	0.043675	0.578475		45.083	0.07181	0.08527	0	2.15E-07		0.243712	1	1	-4143.85	0.215438	1	2.67858	-4143.31	0.301604	1
LOC6580545	0.000402	-	-	0.9998	1		57.3697	0.06142	0.06674	0	2.15E-07		0.230958	1	1	-3708.47	0.262995	1	3.31161	-3708.47	1	1
Gluthione S-transferase
Site model							Branch model						Branch-site model
geneID	diff. LnL	pos/aa	omega	p-value	FDR		diff. LnL	omega_background	omega_foreground	p-value	FDR		w0_null	w1_null	w2_null	lnl_null	w0_alt	w1_alt	w2_alt	lnl_alt	p-value	FDR
LOC122757020	0.000116	-	-	0.99994	1		21.2335	0.10942	0.0458	4e-06	7.93846153846154E-06		0.258529	1	1	-1285.47	0.250205	1	3.28631	-1285.47	1	1
LOC6573110	0.000178	-	-	0.99991	1		19.982	0.04457	0.0001	8e-06	1.51764705882353E-05		0.213876	1	1	-1314.43	0.252377	1	2.6901	-1314.43	0.998404	1
LOC6573113	0.671672	-	-	0.71474	1		7.86877	0.07433	0.27058	0.00503	0.00606421		0.240277	1	1	-1422.91	0.255536	1	2.73331	-1422.91	0.952036	1
LOC6573114	1e-05	-	-	1	1		10.5389	0.20908	0.05879	0.001169	0.00155465		0.211962	1	1	-720.286	0.205098	1	2.76713	-720.286	1	1
LOC6573115	0.000136	-	-	0.99993	1		4.08398	0.04357	0.18805	0.043292	0.0446773		0.27359	1	1	-1184.86	0.213107	1	3.29395	-1184.86	1	1
LOC6576051	0.000818	-	-	0.99959	1		40.7946	0.05797	0.07679	0	2.15E-07		0.288445	1	1	-3597.52	0.218282	1	2.53928	-3597.52	1	1
LOC6577143	0.000328	-	-	0.99984	1		5.68249	0.07108	0.20063	0.017135	0.0184201		0.251005	1	1	-1408.67	0.25101	1	2.59176	-1408.67	1	1
LOC6578702	5.4e-05	-	-	0.99997	1		4.6951	0.102	0.21231	0.030249	0.0317246		0.245264	1	1	-1360.01	0.280428	1	3.00651	-1360.01	1	1
LOC6578914	0.225834	-	-	0.89322	1		14.6292	0.09869	0.14538	0.000131	0.000189876		0.235475	1	1	-1571.07	0.277129	1	2.80119	-1571.07	1	1
LOC6578915	0.000198	-	-	0.9999	1		33.5154	0.08823	0.0784	0	2.15E-07		0.287561	1	1	-1481.65	0.279332	1	3.3857	-1480.33	0.10457	1
LOC6578931	0.751322	-	-	0.68684	1		16.1575	0.11596	0.15391	5.8e-05	9.23703703703704E-05		0.229684	1	1	-1442.07	0.291937	1	2.70468	-1442.07	1	1
LOC6580536	0.000168	-	-	0.99992	1		24.329	0.013	0.0299	1e-06	2.04761904761905E-06		0.202017	1	1	-1194.58	0.237774	1	2.91053	-1194.38	0.527866	1
LOC6580949	0.000208	-	-	0.9999	1		14.9693	0.06029	0.14059	0.000109	0.000163103		0.20719	1	1	-1498.34	0.290676	1	3.38336	-1498.34	1	1
LOC6584932	2.12313	-	-	0.34591	1		16.3166	0.03211	0.03314	5.4e-05	8.81772151898734E-05		0.208795	1	1	-1305.98	0.298592	1	2.88413	-1305.98	1	1
LOC6585066	0.00975	-	-	0.99514	1		7.25164	0.03877	0.14833	0.007084	0.00838382		0.262219	1	1	-898.91	0.274449	1	2.79173	-898.91	1	1
LOC6586477	0.000106	-	-	0.99995	1		7.35978	0.09487	0.08485	0.00667	0.00796694		0.263834	1	1	-1500.5	0.204333	1	3.07691	-1500.5	1	1
UDP-Glycosyltransferases
Site model							Branch model						Branch-site model
geneID	diff. LnL	pos/aa	omega	p-value	FDR		diff. LnL	omega_background	omega_foreground	p-value	FDR		w0_null	w1_null	w2_null	lnl_null	w0_alt	w1_alt	w2_alt	lnl_alt	p-value	FDR
LOC116803942	0.018484	-	-	0.9908	1		31.7125	0.18564	0.17935	0	2.15E-07		0.278974	1	1	-3753.57	0.215415	1	2.59579	-3753.57	1	1
LOC6575818	7.4e-05	-	-	0.99996	1		26.7063	0.13439	0.07332	0	2.15E-07		0.273411	1	1	-2049.82	0.205958	1	2.52502	-2049.82	1	1
LOC6575819	0.800156	-	-	0.67027	1		34.4151	0.09521	0.12246	0	2.15E-07		0.270697	1	1	-3503.39	0.294357	1	2.89121	-3503.46	1	1
LOC6575968	0.142584	-	-	0.93119	1		8.58409	0.23562	0.29493	0.003391	0.00420614		0.268902	1	1	-3411.98	0.254908	1	2.8445	-3411.98	1	1
LOC6577197	0.000116	-	-	0.99994	1		20.9462	0.12774	0.13777	5e-06	9.77272727272727E-06		0.220811	1	1	-3379.41	0.222748	1	3.45242	-3379.41	0.961899	1
LOC6577898	5.35605	-	-	0.068699	0.717448		41.5069	0.17236	0.08808	0	2.15E-07		0.274736	1	1	-3523.52	0.299533	1	2.8835	-3523.52	1	1
LOC6578664	2.2e-05	-	-	0.99999	1		25.3121	0.16694	0.15732	0	2.15E-07		0.28857	1	1	-3679.19	0.278405	1	2.84614	-3679.19	1	1
LOC6579307	0.273206	-	-	0.87232	1		41.3303	0.12819	0.15764	0	2.15E-07		0.29711	1	1	-3942.07	0.290477	1	2.95865	-3942.07	1	1
LOC6582725	3.70229	174/R	1.481	0.15706	1		138.127	0.05508	0.04865	0	2.15E-07		0.289917	1	1	-9513.63	0.237096	1	3.46508	-9513.63	1	1
