# Supplementary material for: Transposable elements contribute to the evolution of host shift–related genes in cactophilic Drosophila species
Source: HighWire-hosted journal article supplement (doi:10.1101/gr.280463.125), 2026-02-10
Supplement: Supplemental_Table_S6.xlsx [file Supplemental_Table_S6.xlsx]

## Sheet: Table S6
Table S6: Two-proportion Z-test results between proportion of the genome composed by Helitrons, and proportion of Helitrons in the promoters of ORs. Significantly higher proportion of Helitrons than expected based on genome distribution was observed in the four genomes of species from the mojavensis cluster.
D. m. mojavensis
	Helitron content in the genome			Helitron frequency at OR promoters	Chi-squared	P-value
Helitron bp	13689277		Helitron copy	27	3.9954	0.02281
Total TE bp	42388058		Total copies	61
D. m. wrigleyi
	Helitron content in the genome			Helitron frequency at OR promoters	Chi-squared	P-value
Helitron bp	11192371		Helitron copy	26	4.7025	0.01506
Total TE bp	36756724		Total copies	60
D. m. sonorensis
	Helitron content in the genome			Helitron frequency at OR promoters	Chi-squared	P-value
Helitron bp	13306350		Helitron copy	24	6.965	0.004156
Total TE bp	13306350		Total copies	45
D. arizonae
	Helitron content in the genome			Helitron frequency at OR promoters	Chi-squared	P-value
Helitron bp	15018715		Helitron copy	26	4.4805	0.01714
Total TE bp	38266232		Total copies	48
D. buzzatii
	Helitron content in the genome			Helitron frequency at OR promoters	Chi-squared	P-value
Helitron bp	9046674		Helitron copy	8	0.00068476	0.5104
Total TE bp	26936163		Total copies	24
D. koepferae
	Helitron content in the genome			Helitron frequency at OR promoters	Chi-squared	P-value
Helitron bp	9883409		Helitron copy	7	0.40827	0.2614
Total TE bp	27393927		Total copies	16
