# Supplementary material for: Transposable elements contribute to the evolution of host shift–related genes in cactophilic Drosophila species
Source: HighWire-hosted journal article supplement (doi:10.1101/gr.280463.125), 2026-02-10
Supplement: Supplemental_Table_S14.xlsx [file Supplemental_Table_S14.xlsx]

## Sheet: Table S14
Table S14: Access to RNA-seq data used to perform gene annotation with BRAKER3.
Species	Tissue	Access
D. buzzatii	Head	This study
	Larvae	This study
	Egg	https://dbuz.uab.cat/Files/st1/Filtered_reads_Egg_R1_001_quality.fastq
	Whole-body female	https://dbuz.uab.cat/Files/st1/Filtered_reads_AdultFemale_R1_001_quality.fastq
	Whole-body male	https://dbuz.uab.cat/Files/st1/Filtered_reads_AdultMale_R1_001_quality.fastq
	Pupae	https://dbuz.uab.cat/Files/st1/Filtered_reads_Pupae_R1_001_quality.fastq
D. koepferae	Head	This study
	Larvae	This study
	Whole-body male (no reproductive tract)	https://www.ncbi.nlm.nih.gov/sra/?term=SRR8980759
	Ovary	https://www.ncbi.nlm.nih.gov/sra/?term=SRR5145565
	Testes	https://www.ncbi.nlm.nih.gov/sra/?term=SRR8980758
