# Supplementary figures and images for: Transposable elements contribute to the evolution of host shift–related genes in cactophilic Drosophila species
Source: HighWire-hosted journal article supplement (doi:10.1101/gr.280463.125), 2026-02-10

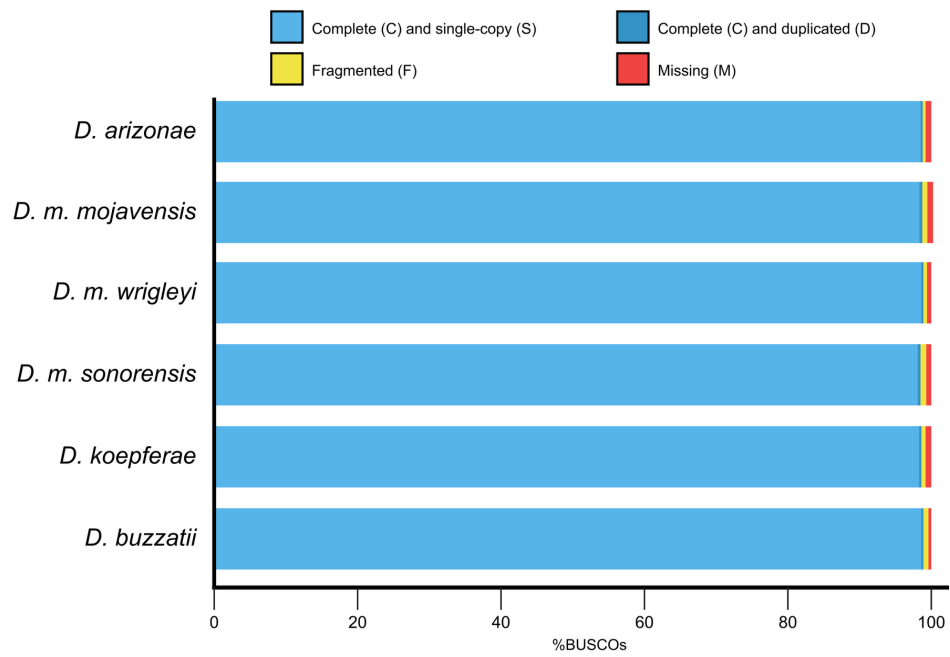

**Sup. Figure 1:** BUSCO score for the Nanopore genome assemblies.

Supplement: Supplemental_Fig_S1.pdf [file Supplemental_Fig_S1.pdf]
